# Supplementary material
Source: Springer Nature journal article supplement (https://www.springermedizin.de/resource/supplementary/12936_2014_3569_MOESM20_ESM.pdf/9545928)
Supplement: MOESM20 [file 9545928]

| Imp # | Compound [formula, mono-isotopic mass]                                                                                                              | Structure                                                                           | origin                                             |
|-------|-----------------------------------------------------------------------------------------------------------------------------------------------------|-------------------------------------------------------------------------------------|----------------------------------------------------|
| 1     | 5-hydroxy-7-chloro-quinoline [C <sub>9</sub> H <sub>6</sub> ClNO, MW 179.0208]                                                                      |     | Impurities in raw materials                        |
| 2     | 4-hydroxy-7-chloro-quinoline [C <sub>9</sub> H <sub>6</sub> ClNO, MW 179.0207]                                                                      |    | Impurities in raw materials                        |
| 3     | (7-chloro-quinoline-4-yl) piperazine [C <sub>13</sub> H <sub>14</sub> ClN <sub>3</sub> , MW 247.0954]                                               |    | Synthesis                                          |
| 4     | 4-amino-7-chloro-quinoline [C <sub>9</sub> H <sub>7</sub> ClN <sub>2</sub> , MW 178.0369]                                                           |    | Impurities in raw materials                        |
| 5     | 1-hydroxy-3-(7-chloro-4-quinolin-4-piperazinyl) propane [C <sub>16</sub> H <sub>20</sub> ClN <sub>3</sub> O, MW 305.1378]                           |    | Synthesis                                          |
| 6     | piperaquine oxide [C <sub>29</sub> H <sub>32</sub> Cl <sub>2</sub> N <sub>6</sub> O, MW 550.2094]                                                   |    | Oxidative stress<br>Degradation                    |
| 7     | piperaquine oxide [C <sub>29</sub> H <sub>34</sub> Cl <sub>2</sub> N <sub>6</sub> O <sub>3</sub> , MW 584.2152]                                     |   | Oxidative stress<br>Alkaline stress<br>Degradation |
| 8     | piperaquine oxide [C <sub>29</sub> H <sub>32</sub> Cl <sub>2</sub> N <sub>6</sub> O, MW 550.2094]                                                   |  | Oxidative stress<br>Degradation                    |
| 9     | 1-(1-(4-quinolyl)-4-piperazinyl)-3-(1-(7-chloro-4-quinolyl)-4-piperazinyl) propane [C <sub>29</sub> H <sub>33</sub> ClN <sub>6</sub> , MW 500.2536] |  | Oxidative stress<br>Degradation                    |
| 10    | piperaquine oxide [C <sub>29</sub> H <sub>32</sub> Cl <sub>2</sub> N <sub>6</sub> O, MW 550.2094]                                                   |  | Oxidative stress<br>Degradation                    |
| 11    | piperaquine isomer [C <sub>29</sub> H <sub>32</sub> Cl <sub>2</sub> N <sub>6</sub> , MW 534.2146]                                                   |  | Synthesis                                          |
| 12    | 4-bis-(4,7-dichloroquinoline) piperazine [C <sub>22</sub> H <sub>18</sub> Cl <sub>2</sub> N <sub>4</sub> , MW 408.0987]                             |  | Synthesis                                          |
